# Supplementary material for: Performance Metrics for Selecting Single Nucleotide Polymorphisms in Late-onset Alzheimer’s Disease
Source: PubMed Central journal article supplement (PMC5090242; doi:10.1038/srep36155), 2016-11-02
Supplement: srep36155-s1.pdf [file srep36155-s1.pdf]

# Performance Metrics for Selecting Genetic Polymorphisms in Late-onset Alzheimer's Disease

Short title: Performance metrics of Genetic Markers for Alzheimer's Disease

Yen-Ching Chen<sup>1,2,3\*</sup>, Chi-Jung Hsiao<sup>1</sup>, Chien-Cheng Jung<sup>1</sup>, Hui-Han Hu<sup>4</sup>, Jen-Hau Chen<sup>1,5</sup>,  
Wen-Chung Lee<sup>1,2,3</sup>, Jeng-Min Chiou<sup>6</sup>, Ta-Fu Chen<sup>7</sup>, Yu Sun<sup>8</sup>, Li-Li Wen<sup>9</sup>, Ping-Keung  
Yip<sup>10,11</sup>, Yi-Min Chu<sup>12</sup>, Chien-Jen Chen<sup>4\*</sup>, Hwai-I Yang<sup>4,13\*</sup>

<sup>1</sup> Institute of Epidemiology and Preventive Medicine, College of Public Health, National Taiwan University, Taipei, Taiwan;

<sup>2</sup> Department of Public Health, College of Public Health, National Taiwan University, Taipei, Taiwan;

<sup>3</sup> Research Center for Genes, Environment and Human Health, College of Public Health, National Taiwan University, Taipei, Taiwan;

<sup>4</sup> Genomics Research Center, Academia Sinica, Taipei, Taiwan;

<sup>5</sup> Department of Geriatrics and Gerontology, National Taiwan University, Taipei, Taiwan;

<sup>6</sup> Institute of Statistical Science, Academia Sinica, Taipei, Taiwan;

<sup>7</sup> Department of Neurology, National Taiwan University Hospital, Taipei, Taiwan;

<sup>8</sup> Department of Neurology, En Chu Kong Hospital, Taipei, Taiwan;

<sup>9</sup> Department of Laboratory Medicine, En Chu Kong Hospital, Taipei, Taiwan;

<sup>10</sup> Center of Neurological Medicine, Cardinal Tien Hospital, Taipei, Taiwan;

<sup>11</sup> School of Medicine, Fu-Jen Catholic University, New Taipei City, Taiwan;

<sup>12</sup> Department of Laboratory Medicine, Cardinal Tien Hospital, Taipei, Taiwan;

<sup>13</sup> Institute of Clinical Medicine, National Yang-Ming University, Taipei, Taiwan.

\* Address for reprint requests and correspondence: Dr. Yen-Ching Chen, No. 17 Xu-Zhou Road, Institute of Epidemiology and Preventive Medicine, College of Public Health, National Taiwan University, Taipei, Taiwan. Telephone: 886-2-3366-8019. Fax: 886-2-2351-1955. E-mail: [karenchen@ntu.edu.tw](mailto:karenchen@ntu.edu.tw)

Dr. Chien-Jen Chen, Genomics Research Center, Academia Sinica, Taipei, Taiwan. E-mail:

[chencj@gate.sinica.edu.tw](mailto:chencj@gate.sinica.edu.tw)

Dr. Hwai-I Yang, Genomics Research Center, Academia Sinica, Taipei, Taiwan. Telephone:

886-2-2787-1308. E-mail: [hiyang@gate.sinica.edu.tw](mailto:hiyang@gate.sinica.edu.tw)

## Supplementary Figure and Table Legends

**Figure S1.** Quantile-quantile plots of the observed  $P$ -values for the association of each SNP and LOAD risk

**Figure S2.** Manhattan plot for 500,941 single nucleotide polymorphisms of the study population

**Table S1.** Questionnaire for collecting demographic information and disease comorbidities

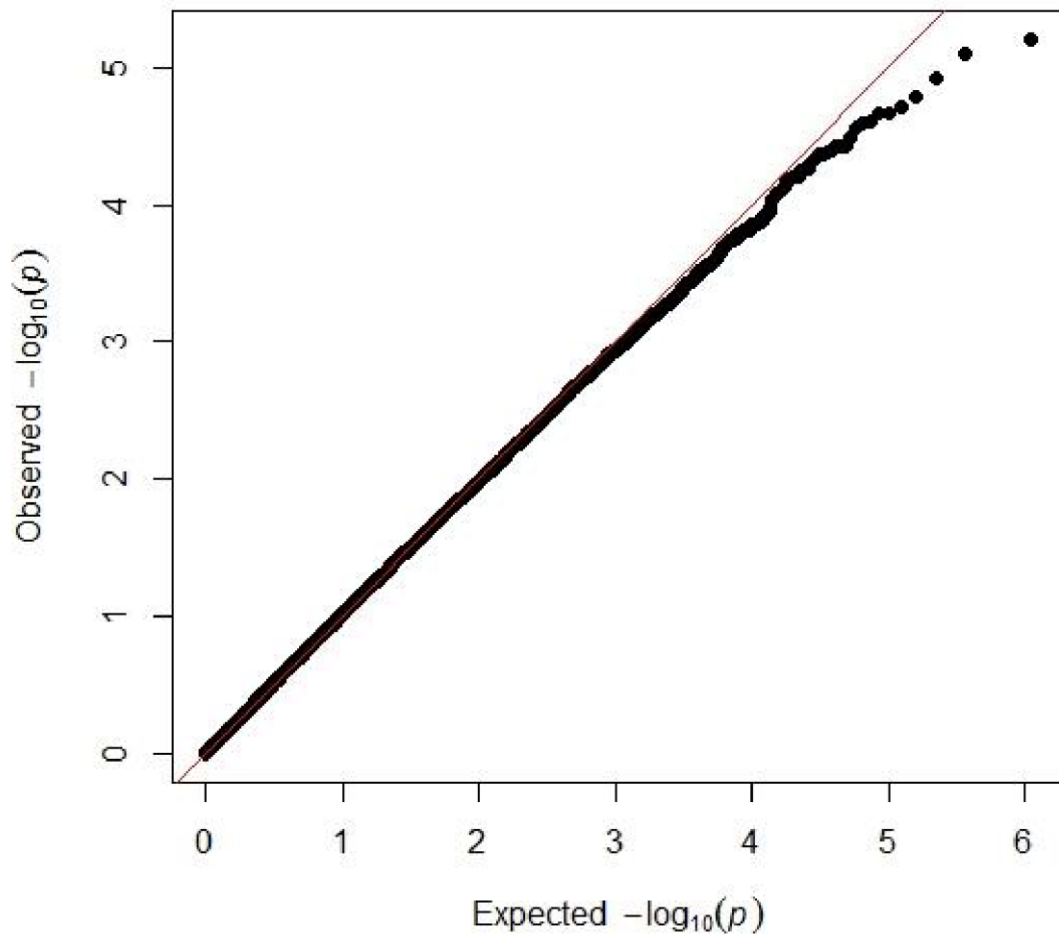

**Figure S1.** Quantile-quantile plots of the observed  $P$ -values for the association of each SNP and LOAD risk

The QQ plot reflects several SNPs with an observed chi-square  $P$ -value smaller than the expected  $P$ -value at  $10^{-5}$ , but none of them reach statistical significance ( $P < 10^{-7}$ ). The solid diagonal line indicates the expected  $P$ -value (i.e., null hypothesis of no association between SNPs and LOAD) with a slope of 1 and an intercept of 0.

**Abbreviations:** QQ, Quantile-Quantile; SNP, single nucleotide polymorphism.

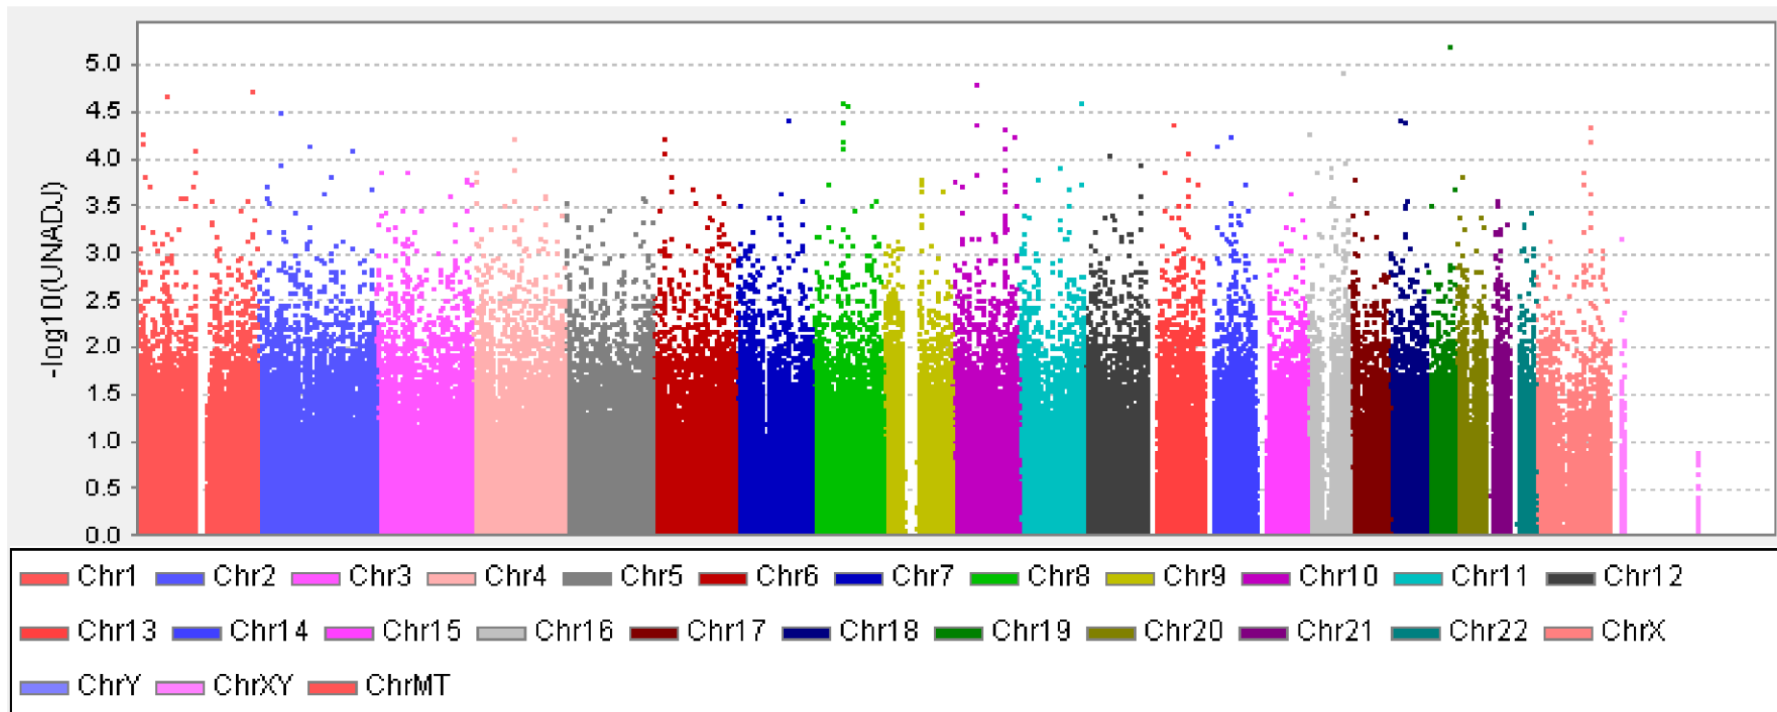

**Figure S2.** Manhattan plot for 500,941 single nucleotide polymorphisms of the study population

**Abbreviations:** **CHR**, chromosome; **SNP**, single nucleotide polymorphism.

The Y-axis indicates the  $-\log_{10}P$  of the Cochran-Armitage trend test.

The X-axis indicates the corresponding position of each SNP on the chromosome.

**Table S1.** Questionnaire for collecting demographic information and disease comorbidities

|                           |                                                                                                                                                                                                                                                                                    |
|---------------------------|------------------------------------------------------------------------------------------------------------------------------------------------------------------------------------------------------------------------------------------------------------------------------------|
| <b>Basic information:</b> |                                                                                                                                                                                                                                                                                    |
| ( ) 1                     | Gender: <u>0</u> Female <u>1</u> Male                                                                                                                                                                                                                                              |
| ( ) 2                     | Years of education (since elemental school)                                                                                                                                                                                                                                        |
| ( ) 3.1                   | What is the birthplace of your father? _____                                                                                                                                                                                                                                       |
| ( ) 3.2                   | What is the birthplace of your mother? _____                                                                                                                                                                                                                                       |
| ( ) 3.3                   | What is the birthplace of your grandparents? _____                                                                                                                                                                                                                                 |
| ( ) 3.4                   | What is the birthplace of your maternal grandparents? _____                                                                                                                                                                                                                        |
| ( ) 4                     | Work/occupation status: <u>1</u> Unemployment <u>2</u> Housekeeper <u>3</u> Labor <u>4</u> Skilled worker <u>5</u> Captain or self-employed worker <u>6</u> Clerical worker or salesman <u>7</u> Technician or professional <u>8</u> Supervisor or entrepreneur <u>999</u> Unknown |
| ( ) 5                     | Annual household income (New Taiwan Dollar): <u>1</u> < 300,000 <u>2</u> 300,000-800,000 <u>3</u> 800,000-1,000,000 <u>4</u> > 1,000,000 <u>999</u> Unknown                                                                                                                        |
| ( ) 6                     | Current weight ( Kilogram)                                                                                                                                                                                                                                                         |
| ( ) 7                     | Current height ( Centimeter)                                                                                                                                                                                                                                                       |
| ( ) 8                     | Menopause: <u>0</u> Not yet <u>1</u> Yes <u>2</u> Not applicable <u>999</u> Unknown                                                                                                                                                                                                |
| ( ) 9                     | Religious affiliation: <u>0</u> No <u>1</u> Christian <u>2</u> Catholicism <u>3</u> Taoism <u>4</u> Buddhism <u>5</u> Islam <u>6</u> Other                                                                                                                                         |
| ( ) 10                    | Family support: <u>1</u> Live with spouse and kid(s) <u>2</u> Live with spouse <u>3</u> Live with kid(s) <u>4</u> Live with grandchildren or other relatives <u>5</u> Live alone <u>6</u> Live at nursing home                                                                     |
| ( ) 11                    | Marital status: <u>1</u> Un-married <u>2</u> Widowed <u>3</u> Divorced/separated <u>4</u> Married <u>5</u> Co-habit                                                                                                                                                                |
| ( ) 12                    | Alcohol drinking: <u>0</u> No <u>1</u> Yes                                                                                                                                                                                                                                         |
| ( ) 13                    | Cigarette smoking: <u>0</u> No on average <u>1</u> < 1 pack per day <u>2</u> 1-2 packs per day <u>3</u> > 2 packs per day                                                                                                                                                          |
| ( ) 14                    | Hypertension: <u>0</u> No <u>1</u> Clinic visit and regular medication <u>2</u> Clinic visit but without regular medication                                                                                                                                                        |
| ( ) 15                    | Diabetes mellitus: <u>0</u> No <u>1</u> Clinic visit and regular medication <u>2</u> Clinic visit but without regular medication                                                                                                                                                   |
| ( ) 16                    | Stroke: <u>0</u> No <u>1</u> Clinic visit and regular medication <u>2</u> Clinic visit but without regular medication                                                                                                                                                              |
| ( ) 17                    | Hyperlipidemia: <u>0</u> No <u>1</u> Clinic visit and regular medication <u>2</u> Clinic visit but without regular medication                                                                                                                                                      |
| ( ) 18                    | Heart diseases: <u>0</u> No <u>1</u> Clinic visit and regular medication <u>2</u> Clinic visit but without regular medication                                                                                                                                                      |
